# Supplementary material for: Rapid and effective preparation of a HPEI modified biosorbent based on cellulose fiber with a microwave irradiation method for enhanced arsenic removal in water
Source: Royal Society of Chemistry journal article supplement (doi:10.1039/c6ta06051j), 2016-01-01
Supplement: c6ta06051j1.pdf [file c6ta06051j1.pdf]

## Supporting Information

for

### Rapid and effective preparation of HPEI modified biosorbent based on cellulose fiber with microwave irradiation method for enhanced arsenic removal in water

Sheng Deng,<sup>a</sup> Guangshan zhang,<sup>\*ab</sup> Shuwei Chen,<sup>b</sup> Yanei Xue,<sup>b</sup> Zhaolin Du<sup>b</sup> and  
Peng Wang<sup>\*ab</sup>

*<sup>a</sup>State Key Laboratory of Urban Water Resource and Environment, Harbin Institute of  
Technology, Harbin 150090, PR China*

*<sup>b</sup>School of Municipal and Environmental Engineering, Harbin Institute of Technology,  
Harbin 150090, PR China*

\*Corresponding author. Tel.: +86-451-86283557; Fax: +86-451-86283557.

\*Corresponding author.

E-mail addresses: [gszhanghit@gmail.com](mailto:gszhanghit@gmail.com) (G.S. Zhang), [pwang73@vip.sina.com](mailto:pwang73@vip.sina.com) (P.  
Wang)

**Fig. S1** shows the components of the microwave reactor which purchase from PreeKem Scientific Instruments Co., Ltd. The maximum output of the reactor is 1200 W and the temperature was controlled precisely by inserting fiber optic sensor into the solution. In addition, both mechanical and magnetic stirring are available for application.

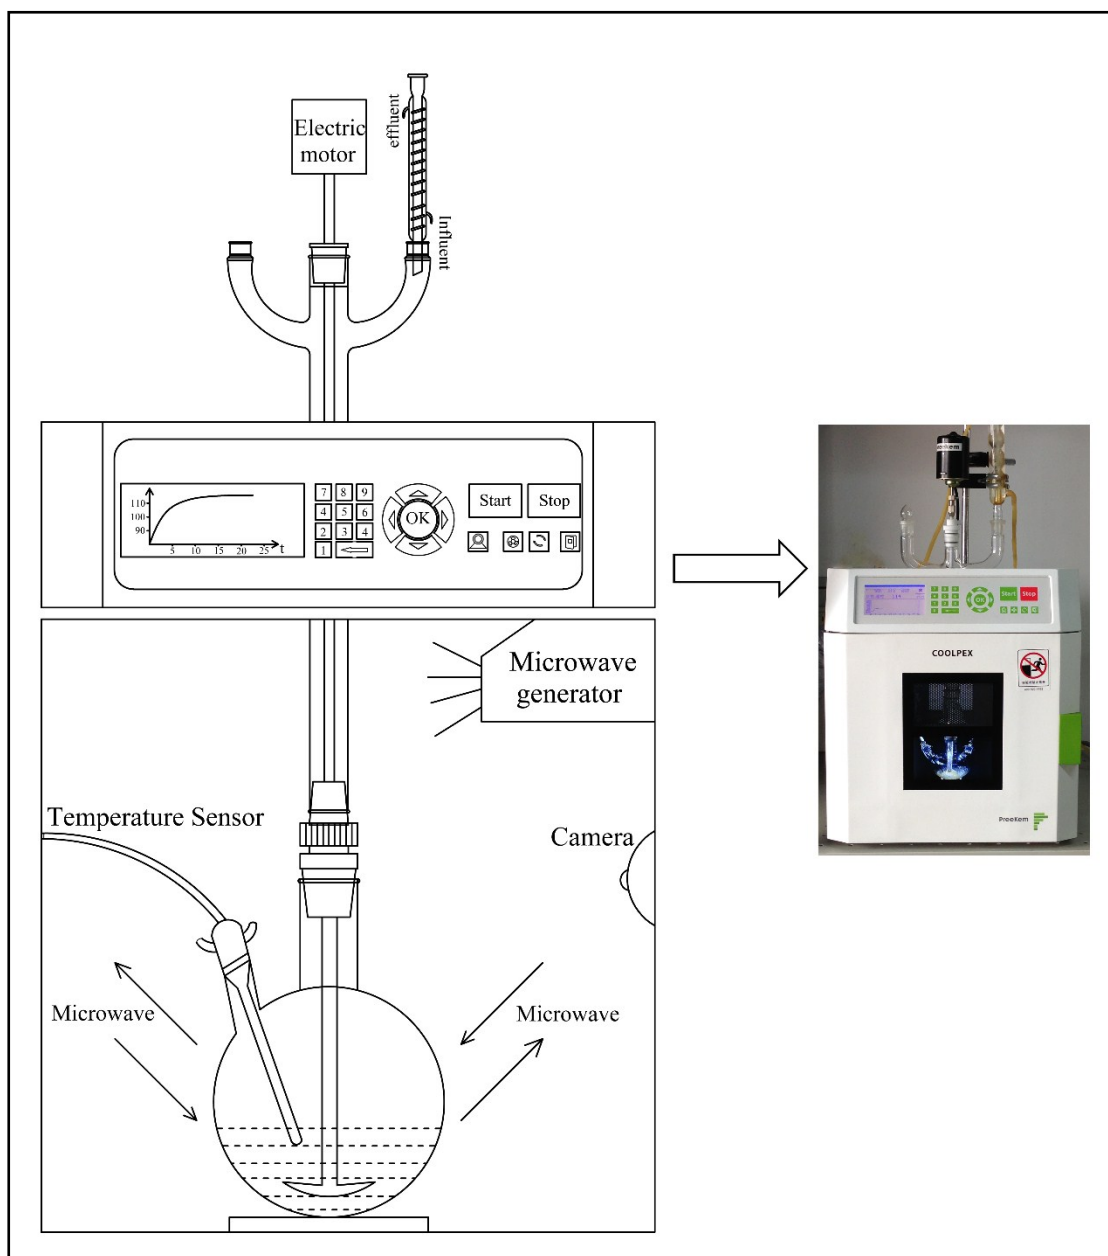

**Fig. S1** The feature of the MW reactor (PreeKem Scientific Instruments Co., Ltd.).

**Fig. S2** exhibits the effects of reaction temperature and time for the synthesis of Cell<sub>MW</sub>-ECH fibers and mass ratio of HPEI (wt%) for the preparation of Cell<sub>MW</sub>-HPEI fiber under MW irradiation.

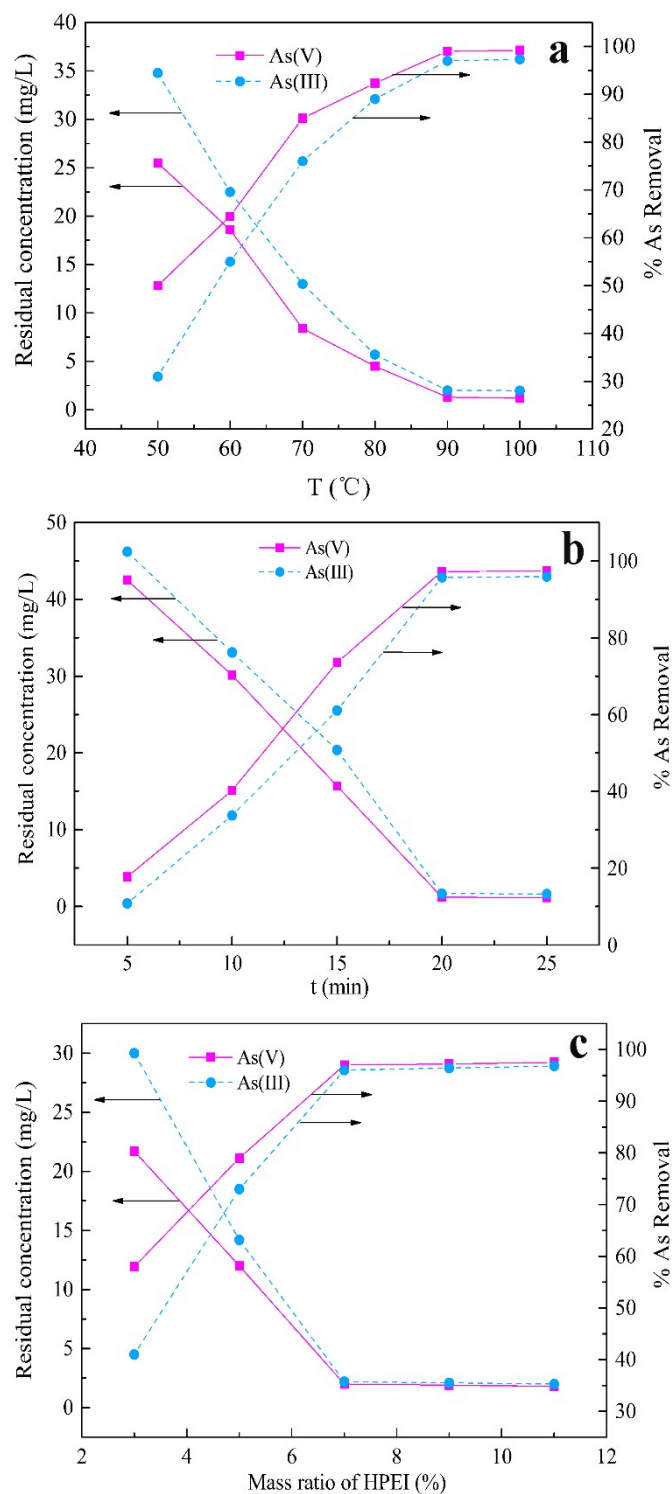

**Fig. S2** The residue concentration and the calculated removal efficiency (%) of As(III)/As(V) ions influenced by (a) temperature; (b) reaction time; (c) mass ratio of HPEI (%).

### Adsorption Kinetics:

The pseudo-first-order is the Lagergren pseudo-first order rate equation:

$$q_t = q_e (1 - e^{-k_1 t}) \quad (1)$$

where  $q_e$  and  $q_t$  are the amount of arsenic adsorbed ( $\text{mg} \cdot \text{g}^{-1}$ ) at equilibrium and at time  $t$  (min), respectively, while  $k_1$  ( $\text{min}^{-1}$ ) is the rate constants of the pseudo-first-order model.

The pseudo-second-order kinetic rate equation is expressed as:

$$q_t = \frac{q_e^2 k_2 t}{1 + q_e k_2 t} \quad (2)$$

where  $k_2$  ( $\text{g} \cdot \text{mg}^{-1} \cdot \text{min}^{-1}$ ) is the pseudo-second-order rate constant.

The intraparticle diffusion kinetics model of Weber and Morris is represented as follows:

$$q_t = k_3 t^{0.5} + C \quad (3)$$

where,  $k_3$  ( $\text{mg} \cdot \text{g}^{-1} \cdot \text{min}^{-1/2}$ ) is the intraparticle diffusion rate constant and  $C$  is the boundary layer thickness.

Typically, these equations are linearized in order that the constants can be found. However, for the sake of reducing error structure and incorrect results in the parameter searching, transformation of linear forms to non-linear kinetic equations were conducted and the data were analyzed by using the following non-linear chi-square test ( $\chi^2$ ):

$$\chi^2 = \sum_{i=1}^n \frac{(q_{e,cal} - q_{e,exp})^2}{q_{e,exp}} \quad (4)$$

where  $q_{e,cal}$  ( $q_{e,calculated}$ ) equilibrium capacity obtained by calculated from model ( $mg \cdot g^{-1}$ ) and  $q_{e,exp}$ . ( $q_{e,experimental}$ ) was the equilibrium capacity from the experimental data ( $mg \cdot g^{-1}$ ). The value of  $\chi^2$  calculated from the equation represents the similarity between the data from model and the data from experiment test. A small  $\chi^2$  value indicated similarities, while a larger number represents variation of the experimental data.

### Adsorption isothermals:

The Langmuir isotherm model is based on the assumption that the adsorbate forms a saturated molecular layer on the adsorbent surface, and the surface sites shares the same energy with no solute-solute or solute-solvent interaction in either phase and transmigration of adsorbate on the plane of the surface. The Langmuir isotherm model can be expressed as:

$$q_e = \frac{q_m K_d C_e}{1 + K_d C_e} \quad (5)$$

where  $q_e$  is the amount of metal ion adsorbed at equilibrium by the adsorbent ( $\text{mg}\cdot\text{g}^{-1}$ ),  $C_e$  is the equilibrium concentration ( $\text{mg}\cdot\text{L}^{-1}$ ),  $q_m$  is theoretical saturation adsorption capacity ( $\text{mg}\cdot\text{g}^{-1}$ ),  $K_d$  ( $\text{L}\cdot\text{mg}^{-1}$ ) is the equilibrium Langmuir constant.

Moreover, the dimensionless separation factor  $R_L$  could be calculated by applying Langmuir parameters in the following equation:

$$R_L = \frac{1}{1 + K_d C_0} \quad (6)$$

This factor can suggest the favorability of the adsorption process, which was believed to be unfavorable ( $R_L > 1$ ), linear ( $R_L = 1$ ), favorable ( $R_L < 1$ ), or irreversible ( $R_L = 0$ ) at each varies.

The Freundlich isotherms model, which assumes a heterogeneous surface and a multilayer adsorption with an energetic non-uniform distribution, can be expressed as:

$$q_e = K_f C_e^{\frac{1}{n}} \quad (7)$$

where  $K_f$  ( $\text{mg}\cdot\text{g}^{-1}$ ) and  $n$  are constants representing the adsorption capacity and intensity of adsorption.

The Temkin isotherm model considers that due to adsorbent-adsorbate interactions, the heat of adsorption of all the molecules in the layer would decrease linearly with coverage. Therefore, the adsorbent surface is a uniform distribution of binding energies. The Temkin adsorption isotherm expression is shown as:

$$q_e = \frac{RT}{B_T} \ln(K_T C_e) \quad (8)$$

where  $K_T$  ( $L \cdot g^{-1}$ ) is the equilibrium binding constant corresponding to the maximum binding energy,  $B_T$  ( $kJ \cdot mol^{-1}$ ) is the Temkin constants relates to the heat of adsorption,  $R$  ( $8.314 J \cdot mol^{-1} \cdot K^{-1}$ ) is the universal gas constant and  $T$  (K) is the absolute temperature.

$q_{e,cal}$  ( $q_{e,calculated}$ ) was the equilibrium capacity from model ( $mg \cdot g^{-1}$ ) and  $q_{e,exp}$  ( $q_{e,experimental}$ ) was the equilibrium capacity obtained from the experimental data ( $mg \cdot g^{-1}$ ).

The thermodynamic parameters  $\Delta G$ ,  $\Delta H$  and  $\Delta S$  for this adsorption process were determined by using following equations:

$$\Delta G = -RT \ln K_d \quad (9)$$

$$\ln k = \frac{\Delta S}{R} - \frac{\Delta H}{RT} \quad (10)$$

where  $K_d$  is the adsorption equilibrium constant obtained from Langmuir model,  $R$  is the universal gas constant ( $8.314 \text{ J}\cdot\text{mol}^{-1}\cdot\text{K}^{-1}$ ),  $T$  is the temperature (K). The values of  $\Delta H$  and  $\Delta S$  could be obtained as the slope and intercept from a linear plot between  $\ln k$  versus  $1/T$  (Fig. S3, Supporting Information) and the parameters are reported in Table S1.

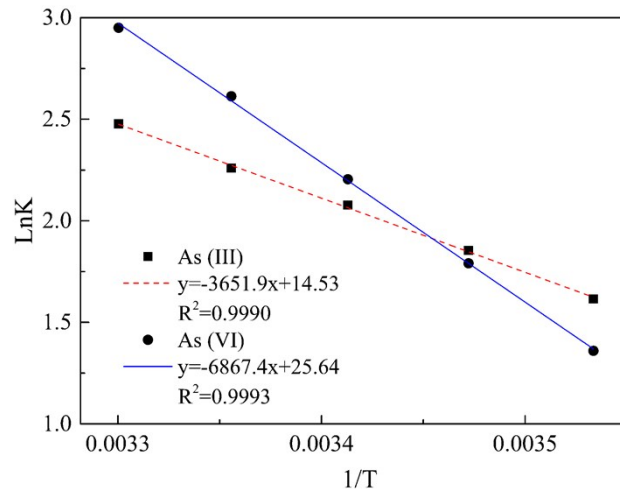

**Fig. S3** Thermodynamic study for the adsorption of As(III) and As(V) using Cell<sub>MW</sub>-HPEI fibers.

**Table S1** Thermodynamic parameters for the adsorption of As(III) and As(V) on Cell<sub>MW</sub>-HPEI.

| Metal ions | $\Delta H$ (kJ·mol <sup>-1</sup> ) | $\Delta S$ (J·mol <sup>-1</sup> ·k) | $\Delta G$ (kJ·mol <sup>-1</sup> ) |       |       |       |        |
|------------|------------------------------------|-------------------------------------|------------------------------------|-------|-------|-------|--------|
|            |                                    |                                     | 283 K                              | 288 K | 293 K | 298 K | 303 K  |
| As (III)   | 30.26                              | 120.6                               | -3.80                              | -4.43 | -5.06 | -5.60 | -6.023 |
| As (V)     | 57.09                              | 196.5                               | -3.20                              | -4.28 | -5.37 | -6.47 | -7.43  |



**Fig. S4** shows the effects of coexisting anions including  $\text{NO}_3^-$ ,  $\text{Cl}^-$ ,  $\text{SO}_4^{2-}$ ,  $\text{PO}_4^{3-}$  and HA on the adsorption of As(III)/As(V) onto  $\text{Cell}_{\text{MW}}$ -HPEI fibers.

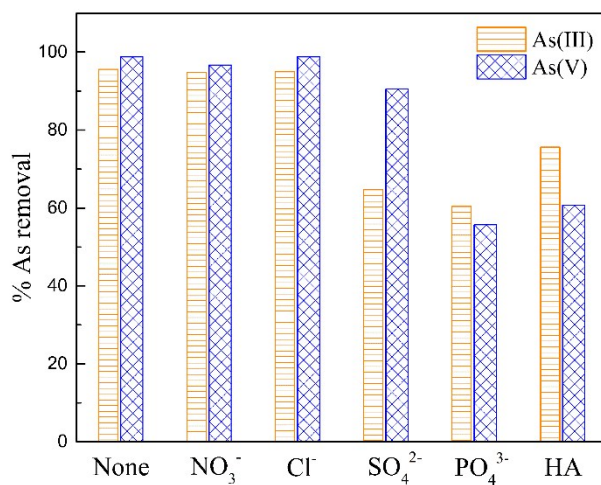

**Fig. S4** Effects of coexisting anions and HA on the adsorption of As(III)/As(V) onto  $\text{Cell}_{\text{MW}}$ -HPEI fibers.
